# Supplementary material for: Genetic Variability and Admixture Zones in the Italian Populations of Turkey Oak (Quercus cerris L.)
Source: MDPI journal article supplement (doi:10.3390/life13010018), 2022-12-21
Supplement: s1 [file s1]

SUPPLEMENTARY MATERIALS

**Table S1.**  $F_{ST}$  &  $R_{ST}$ .  $F_{ST}$  (above diagonal) and  $R_{ST}$  (below diagonal) values for each population pair. Values in bold do not significantly differ from zero (P<0.05), according to the results of a permutation test.

|    | AC    | BC    | BA    | BE    | BF    | BR    | BS    | CF    | CM    | CO    | CV    | DC    | ES    | FI    | LA    | LI    | MA    | MD    | MG    | MT    | SA    | VC    | VT    |
|----|-------|-------|-------|-------|-------|-------|-------|-------|-------|-------|-------|-------|-------|-------|-------|-------|-------|-------|-------|-------|-------|-------|-------|
| AC | -     | 0.051 | 0.087 | 0.026 | 0.048 | 0.050 | 0.088 | 0.072 | 0.012 | 0.083 | 0.005 | 0.009 | 0.026 | 0.075 | 0.009 | 0.049 | 0.044 | 0.079 | 0.127 | 0.041 | 0.022 | 0.105 | 0.043 |
| BC | 0.048 | -     | 0.099 | 0.014 | 0.095 | 0.071 | 0.100 | 0.088 | 0.045 | 0.097 | 0.047 | 0.044 | 0.034 | 0.089 | 0.052 | 0.087 | 0.005 | 0.101 | 0.114 | 0.060 | 0.054 | 0.130 | 0.068 |
| BA | 0.154 | 0.128 | -     | 0.090 | 0.043 | 0.031 | 0.019 | 0.043 | 0.096 | 0.009 | 0.086 | 0.076 | 0.043 | 0.048 | 0.099 | 0.045 | 0.069 | 0.053 | 0.065 | 0.047 | 0.061 | 0.100 | 0.060 |
| BE | 0.024 | 0.000 | 0.125 | -     | 0.076 | 0.064 | 0.093 | 0.084 | 0.013 | 0.091 | 0.026 | 0.024 | 0.011 | 0.097 | 0.020 | 0.077 | 0.017 | 0.078 | 0.121 | 0.049 | 0.041 | 0.111 | 0.057 |
| BF | 0.090 | 0.056 | 0.116 | 0.043 | -     | 0.016 | 0.059 | 0.028 | 0.054 | 0.042 | 0.052 | 0.046 | 0.050 | 0.037 | 0.058 | 0.001 | 0.069 | 0.063 | 0.099 | 0.016 | 0.016 | 0.093 | 0.030 |
| BR | 0.056 | 0.004 | 0.106 | 0.014 | 0.036 | -     | 0.034 | 0.013 | 0.057 | 0.022 | 0.048 | 0.030 | 0.030 | 0.010 | 0.066 | 0.012 | 0.046 | 0.057 | 0.075 | 0.025 | 0.026 | 0.100 | 0.040 |
| BS | 0.165 | 0.153 | 0.004 | 0.158 | 0.171 | 0.131 | -     | 0.042 | 0.102 | 0.014 | 0.090 | 0.070 | 0.050 | 0.050 | 0.103 | 0.049 | 0.071 | 0.052 | 0.063 | 0.058 | 0.061 | 0.103 | 0.072 |
| CF | 0.140 | 0.118 | 0.007 | 0.118 | 0.081 | 0.061 | 0.033 | -     | 0.081 | 0.037 | 0.067 | 0.052 | 0.052 | 0.031 | 0.077 | 0.017 | 0.060 | 0.070 | 0.082 | 0.035 | 0.041 | 0.124 | 0.043 |
| CM | 0.039 | 0.045 | 0.145 | 0.015 | 0.031 | 0.067 | 0.186 | 0.151 | -     | 0.092 | 0.013 | 0.014 | 0.024 | 0.086 | 0.015 | 0.057 | 0.042 | 0.088 | 0.131 | 0.034 | 0.022 | 0.116 | 0.044 |
| CO | 0.152 | 0.132 | 0.000 | 0.132 | 0.126 | 0.100 | 0.020 | 0.001 | 0.163 | -     | 0.080 | 0.057 | 0.045 | 0.042 | 0.098 | 0.039 | 0.065 | 0.057 | 0.074 | 0.056 | 0.054 | 0.112 | 0.064 |
| CV | 0.020 | 0.084 | 0.114 | 0.051 | 0.084 | 0.082 | 0.130 | 0.125 | 0.028 | 0.122 | -     | 0.008 | 0.026 | 0.069 | 0.013 | 0.051 | 0.041 | 0.072 | 0.119 | 0.027 | 0.020 | 0.106 | 0.045 |
| DC | 0.054 | 0.003 | 0.127 | 0.025 | 0.082 | 0.001 | 0.014 | 0.120 | 0.084 | 0.127 | 0.075 | -     | 0.015 | 0.063 | 0.015 | 0.041 | 0.034 | 0.066 | 0.116 | 0.029 | 0.009 | 0.107 | 0.043 |
| ES | 0.016 | 0.036 | 0.121 | 0.009 | 0.026 | 0.027 | 0.153 | 0.091 | 0.007 | 0.120 | 0.012 | 0.053 | -     | 0.056 | 0.027 | 0.047 | 0.024 | 0.042 | 0.091 | 0.028 | 0.027 | 0.086 | 0.045 |
| FI | 0.076 | 0.081 | 0.072 | 0.076 | 0.074 | 0.039 | 0.072 | 0.034 | 0.109 | 0.088 | 0.079 | 0.055 | 0.069 | -     | 0.099 | 0.030 | 0.073 | 0.084 | 0.069 | 0.048 | 0.048 | 0.127 | 0.055 |
| LA | 0.028 | 0.050 | 0.059 | 0.009 | 0.028 | 0.044 | 0.090 | 0.048 | 0.004 | 0.081 | 0.009 | 0.071 | 0.002 | 0.027 | -     | 0.062 | 0.052 | 0.079 | 0.135 | 0.038 | 0.027 | 0.114 | 0.045 |
| LI | 0.087 | 0.089 | 0.136 | 0.073 | 0.016 | 0.067 | 0.165 | 0.101 | 0.046 | 0.162 | 0.070 | 0.102 | 0.042 | 0.042 | 0.021 | -     | 0.061 | 0.055 | 0.088 | 0.009 | 0.017 | 0.096 | 0.034 |
| MA | 0.025 | 0.001 | 0.123 | 0.007 | 0.093 | 0.016 | 0.130 | 0.110 | 0.061 | 0.122 | 0.066 | 0.012 | 0.035 | 0.072 | 0.043 | 0.109 | -     | 0.083 | 0.103 | 0.039 | 0.034 | 0.113 | 0.055 |
| MD | 0.119 | 0.090 | 0.096 | 0.099 | 0.040 | 0.028 | 0.121 | 0.028 | 0.123 | 0.088 | 0.111 | 0.068 | 0.068 | 0.029 | 0.077 | 0.052 | 0.105 | -     | 0.107 | 0.045 | 0.065 | 0.018 | 0.068 |
| MG | 0.302 | 0.304 | 0.133 | 0.328 | 0.277 | 0.249 | 0.109 | 0.150 | 0.344 | 0.131 | 0.254 | 0.253 | 0.286 | 0.163 | 0.262 | 0.264 | 0.296 | 0.151 | -     | 0.095 | 0.094 | 0.148 | 0.097 |
| MT | 0.064 | 0.032 | 0.098 | 0.031 | 0.022 | 0.000 | 0.123 | 0.041 | 0.062 | 0.098 | 0.064 | 0.026 | 0.018 | 0.022 | 0.026 | 0.032 | 0.041 | 0.008 | 0.228 | -     | 0.000 | 0.079 | 0.012 |
| SA | 0.054 | 0.047 | 0.174 | 0.048 | 0.064 | 0.026 | 0.183 | 0.133 | 0.060 | 0.183 | 0.048 | 0.042 | 0.020 | 0.059 | 0.049 | 0.038 | 0.047 | 0.062 | 0.303 | 0.008 | -     | 0.102 | 0.018 |
| VC | 0.126 | 0.111 | 0.156 | 0.122 | 0.052 | 0.057 | 0.180 | 0.084 | 0.144 | 0.157 | 0.159 | 0.103 | 0.098 | 0.039 | 0.102 | 0.051 | 0.133 | 0.014 | 0.218 | 0.043 | 0.098 | -     | 0.095 |
| VT | 0.003 | 0.093 | 0.180 | 0.077 | 0.126 | 0.082 | 0.178 | 0.151 | 0.086 | 0.166 | 0.022 | 0.079 | 0.036 | 0.096 | 0.076 | 0.113 | 0.058 | 0.118 | 0.270 | 0.078 | 0.053 | 0.137 | -     |

**Table S2.** (a) DIC values and relative standard deviations for each K tested and test of significance. See text for details. (b) Test of significance for the different K values.

a.

| K  | DIC     | s.d.  |
|----|---------|-------|
| 2  | 65407.3 | 209.2 |
| 3  | 64671.3 | 64.8  |
| 4  | 64243.0 | 175.8 |
| 5  | 64033.9 | 203.3 |
| 6  | 63872.9 | 502.0 |
| 7  | 63744.3 | 234.5 |
| 8  | 63656.0 | 243.9 |
| 9  | 63616.7 | 294.8 |
| 10 | 63595.4 | 254.4 |

b.

|           | t     | p        | Standard Bonferroni |
|-----------|-------|----------|---------------------|
| K2 vs K3  | 14.8  | 6.35E-08 | 5.08E-07            |
| K3 vs K4  | 11.95 | 3.99E-07 | 3.19E-06            |
| K4 vs K5  | 5.03  | 0.000356 | 2.85E-03            |
| K5 vs K6  | 1.56  | 0.07619  | 6.10E-01            |
| K6 vs K7  | 1.45  | 0.09016  | 7.21E-01            |
| K7 vs K8  | 7.02  | 3.09E-05 | 2.48E-04            |
| K8 vs K9  | 1.15  | 0.1401   | 1.00E+00            |
| K9 vs K10 | 0.51  | 0.3115   | 1.00E+00            |

**Table S3.** PABC index (see Section 2) calculated for the demographic scenarios proposed for the four gene pools.

|         | PABC  |
|---------|-------|
| North   | 0.125 |
| Central | 0.372 |
| South   | 0.394 |
| Sicily  | 0.360 |

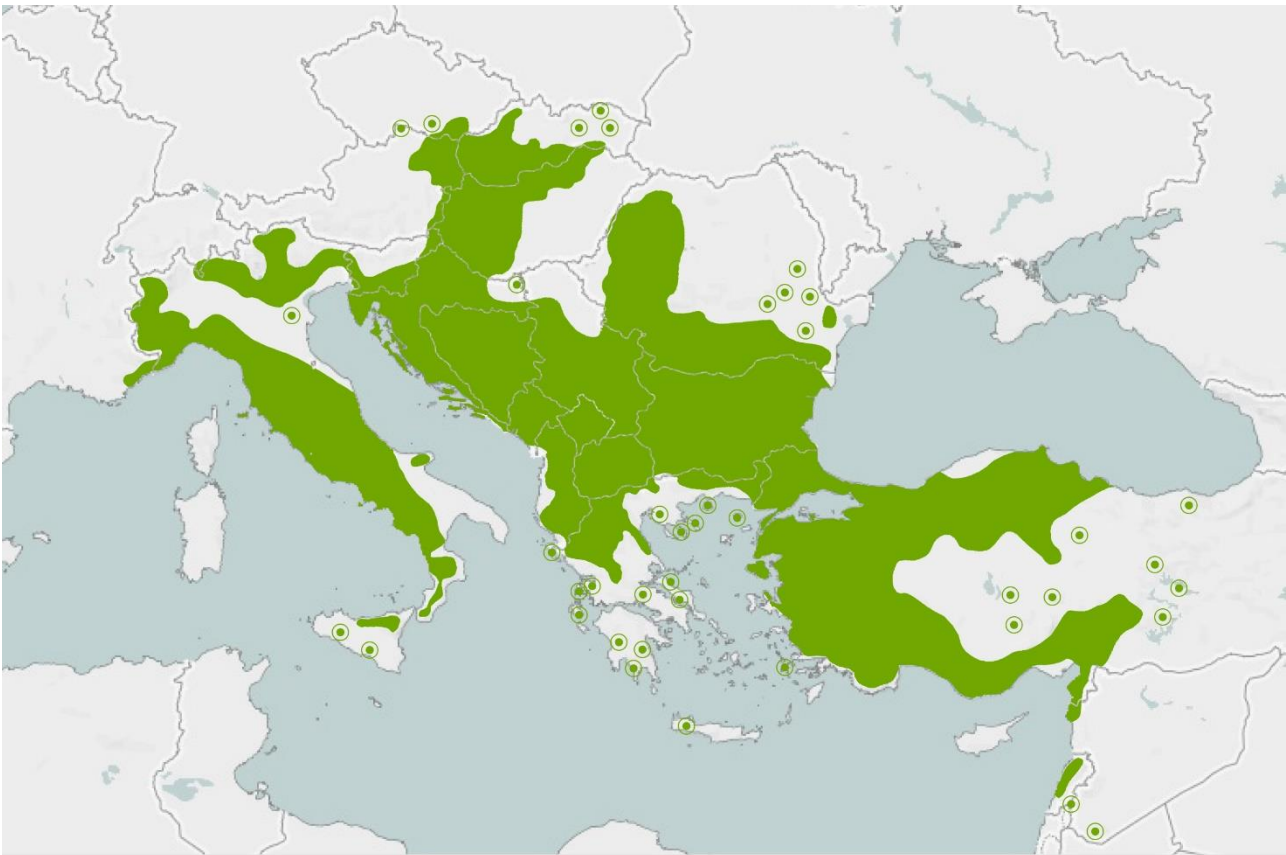

**Figure S1.** *Quercus cerris* distribution range. The native distribution range of the Turkey oak is shown in green while green circles represent isolated populations as described in Caudullo et al. [1] from which this map was modified from.

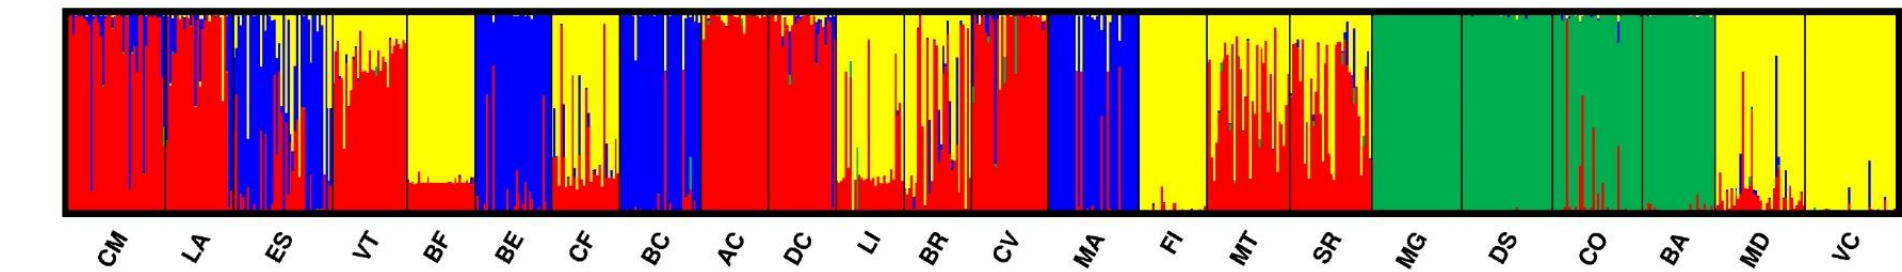

**Figure S2.** Barplot from the Bayesian analysis of population structure. Each bar represents a tree; colours indicate the proportion of genome from each of the four ancestral gene pools. Populations are indicated according to the code of Table 1 in the text.

References

1. Caudullo G.; Welk E.; San-Miguel-Ayanz J. Chorological maps for the main European woody species. *Data Brief* **2017**, 12:662-666.
